# Supplementary material for: Formation of SiO2@C–Ni magnetic nanotubes with excellent performance in 4-nitrophenol reduction
Source: Royal Society of Chemistry journal article supplement (doi:10.1039/d2dt03323b), 2022-01-01
Supplement: d2dt03323b1.pdf [file d2dt03323b1.pdf]

## Supplementary information

### **Formation of SiO<sub>2</sub>@C-Ni Magnetic Nanotubes with Excellent Performance in 4-nitrophenol Reduction**

Yuqin Jin, Jing Zheng\*, Jingli Xu, Xue-Bo Yin, Min Zhang\*

College of Chemistry and Chemical Engineering, Shanghai University of Engineering Science, Shanghai 201620, PR China

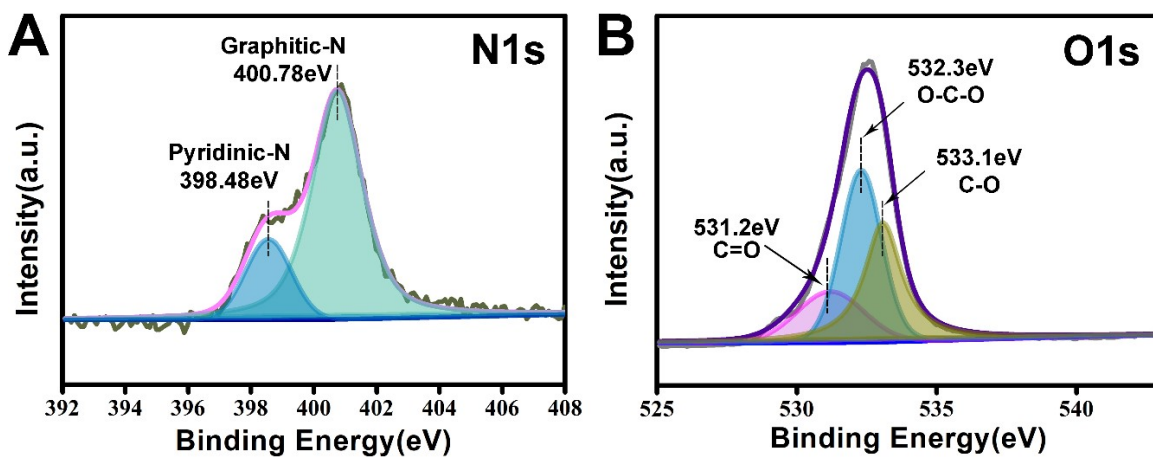

Fig. S1 N1s spectra(A) and O1s spectra(B) of the SiO<sub>2</sub>@C-Ni nanotubes.

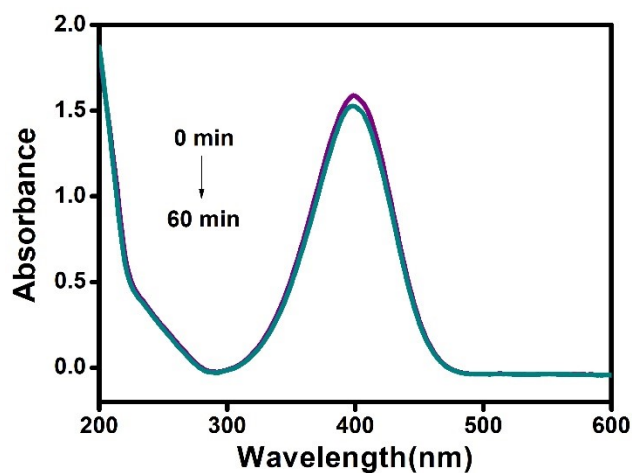

Fig. S2 The UV spectra of the reduction of 4-NP using pure SiO<sub>2</sub> nanotubes as catalyst

Table S1 Properties of SiO<sub>2</sub>@C-Ni/400, SiO<sub>2</sub>@C-Ni/500, and SiO<sub>2</sub>@C-Ni/700 (ICP-AES)

| Sample                     | Average Ni size observed from the TEM images (nm) | Ni loading (μg/mg) |
|----------------------------|---------------------------------------------------|--------------------|
| SiO <sub>2</sub> @C-Ni/400 | 9.9                                               | 1.035              |
| SiO <sub>2</sub> @C-Ni/500 | 16.8                                              | 1.875              |
| SiO <sub>2</sub> @C-Ni/700 | 23.5                                              | 0.935              |
